# Supplementary material for: Polyaniline nanorods random assembly on sugarcane bagasse pith-based carbon sheets with promising capacitive performance
Source: Royal Society of Chemistry journal article supplement (doi:10.1039/c9ra01394f), 2019-01-01
Supplement: c9ra01394f1.pdf [file c9ra01394f1.pdf]

Supporting Information For

**Polyaniline Nanorods Randomly Assembly on the  
Sugarcane Bagasse Pith-based Carbon sheets with  
Promising Capacitive Performance**

Kezheng Gao, Shuyan Zhao, Qingyuan Niu \*, and Lizhen Wang\*

*School of Material and Chemical Engineering, Zhengzhou University of Light*

*Industry, Zhengzhou 450002, P. R. China*

\* Corresponding author:

E-mail addresses: niuqingyuan1984@126.com (Q. Niu); wlz@zzuli.edu.cn (Lizhen Wang)

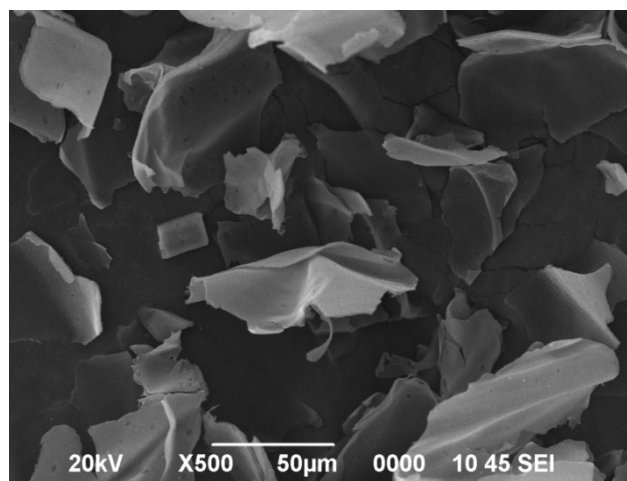

**Fig. S1** SEM of the screened sugarcane pith

**Table S1** The relative percentages of carbon species

| Sample        | C-C/C=C (%) | C-O (%) | C=O (%) | O-C=O (%) |
|---------------|-------------|---------|---------|-----------|
| SPCN          | 40.32       | 34.60   | 15.38   | 9.70      |
| oxidized SPCN | 49.30       | 19.62   | 6.79    | 24.29     |

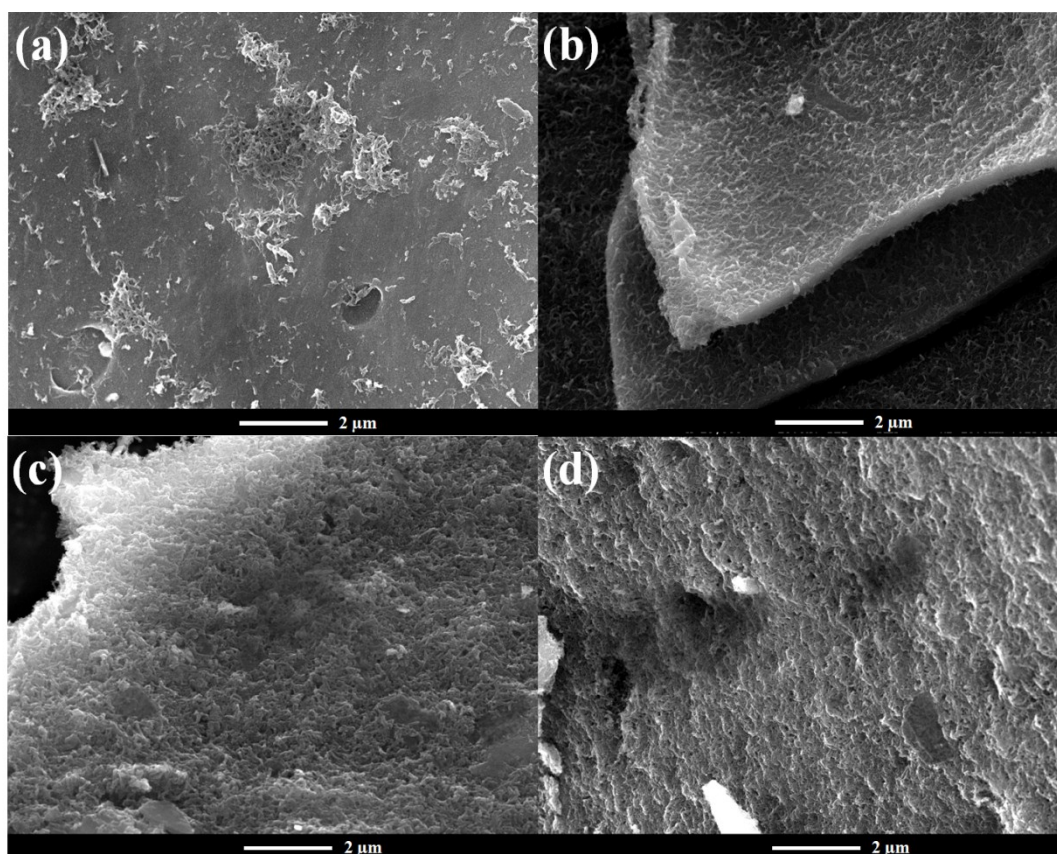

**Fig. S2** FE-SEM of the oxidized SPCN/PANI-0.005 (a), the oxidized SPCN/PANI-0.01 (b), the oxidized SPCN/PANI-0.02 (c) and the oxidized SPCN/PANI-0.04 (d).

**Table S2** Chemical composition of Oxidized SPCN/PANI-X by combustion analysis

| Sample                   | C(wt%) | N( wt %) | PANI( wt %) |
|--------------------------|--------|----------|-------------|
| Oxidized SPCN/PANI-0.005 | 73.2   | 1.9      | 12.8        |
| Oxidized SPCN/PANI-0.01  | 70.6   | 5.1      | 33.9        |
| Oxidized SPCN/PANI-0.02  | 62.4   | 8.1      | 54.1        |
| Oxidized SPCN/PANI-0.04  | 62.8   | 9.8      | 65.3        |

Calculation method: PANI( wt %)=N( wt %)/14×93.14.

**Table S3** The pore structure parameters of the the SPCN, oxidized SPCN and oxidized SPCN/PANI-0.02

| Sample                  | S <sub>BET</sub> (m <sup>2</sup> g <sup>-1</sup> ) | V <sub>total</sub> ( cm <sup>3</sup> g <sup>-1</sup> ) | D <sub>average</sub> ( nm) |
|-------------------------|----------------------------------------------------|--------------------------------------------------------|----------------------------|
| SPCN                    | 417                                                | 0.22                                                   | 2.2                        |
| Oxidized SPCN           | 127                                                | 0.11                                                   | 3.7                        |
| Oxidized SPCN/PANI-0.02 | 51                                                 | 0.31                                                   | 24.5                       |
| Oxidized SPCN/PANI-0.04 | 53                                                 | 0.10                                                   | 7.3                        |

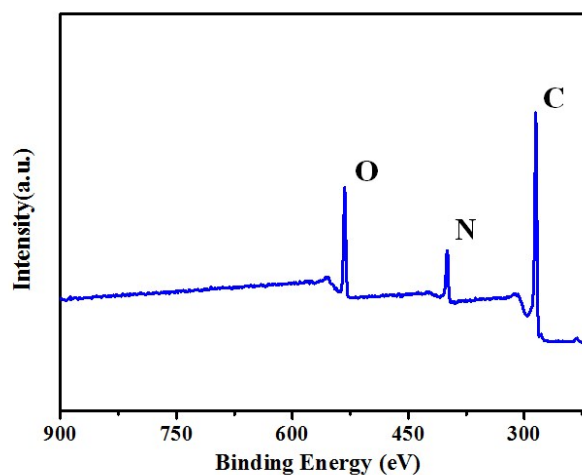

Fig. S3 XPS survey spectrum of the Oxidized SPCN/PANI-0.02.

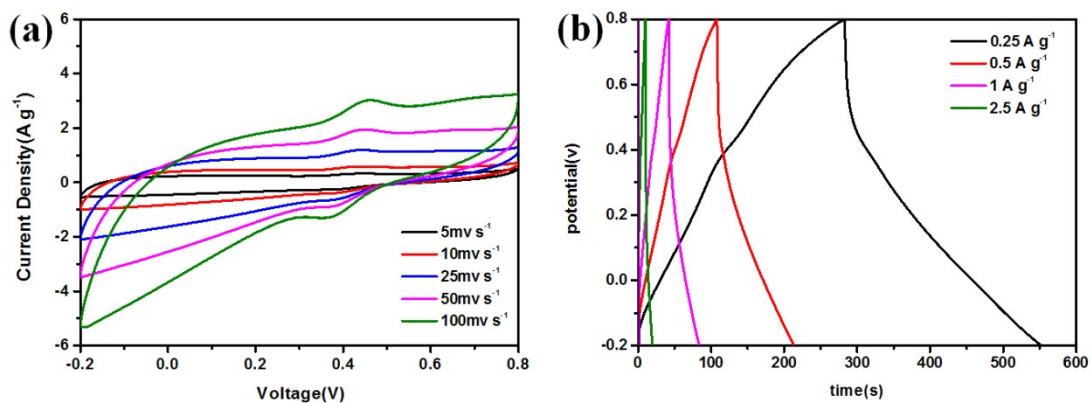

Fig. S4 CV curves of SPCN sample at different scan rates; (b) GCD curves of SPCN sample at different current densities (1 M H<sub>2</sub>SO<sub>4</sub>).

The gravimetric capacitance of the SPCN sample is 67 F g<sup>-1</sup> at current density of 0.25 A g<sup>-1</sup>.

Table S4. Electrochemical performances of different PANI-based electrodes.

| Electrode materials    | Electrolyte                        | Capacitance (F g <sup>-1</sup> ) | References |
|------------------------|------------------------------------|----------------------------------|------------|
| PANI hydrogels         | 1 M H <sub>2</sub> SO <sub>4</sub> | 636 (at 2 A g <sup>-1</sup> )    | S1         |
| G/PANI nanorods/CNT    | 1 M H <sub>2</sub> SO <sub>4</sub> | 638 (at 0.5 A g <sup>-1</sup> )  | S2         |
| 3D RGO/S-PANI          | 1 M H <sub>2</sub> SO <sub>4</sub> | 480 (at 1 A g <sup>-1</sup> )    | S3         |
| RGO/PANI/Vulcan carbon | 1 M H <sub>2</sub> SO <sub>4</sub> | 446 (at 5 mV s <sup>-1</sup> )   | S4         |
| CGR/CNT/PANI           | 1 M H <sub>2</sub> SO <sub>4</sub> | 456 (at 1 A g <sup>-1</sup> )    | S5         |
| RGO/PANI nanoarrays    | 1 M H <sub>2</sub> SO <sub>4</sub> | 727 (at 1 A g <sup>-1</sup> )    | S6         |
| RGO/PANI nanoarrays    | 1 M H <sub>2</sub> SO <sub>4</sub> | 555 (at 0.2 A g <sup>-1</sup> )  | S7         |

|                           |                                        |                                  |     |
|---------------------------|----------------------------------------|----------------------------------|-----|
| RGO/PANI                  | 1 M H <sub>2</sub> SO <sub>4</sub>     | 385 (at 0.5 A g <sup>-1</sup> )  | S8  |
| PANI /GrapheneNanoribbons | 1 M H <sub>2</sub> SO <sub>4</sub>     | 340 (at 0.25 A g <sup>-1</sup> ) | S9  |
| G/ PANI nanoarrays/CF     | 1 M H <sub>2</sub> SO <sub>4</sub>     | 1145 (at 1 A g <sup>-1</sup> )   | S10 |
| G/PANI/CNT                | PVA/H <sub>2</sub> SO <sub>4</sub> gel | 511 (at 1 A g <sup>-1</sup> )    | S11 |
| RGO/PANI                  | 1 M H <sub>2</sub> SO <sub>4</sub>     | 480 (at 1 A g <sup>-1</sup> )    | S12 |
| PANI/CNT                  | 1 M H <sub>2</sub> SO <sub>4</sub>     | 424 (at 0.1 A g <sup>-1</sup> )  | S13 |
| PANI nanorods             | 1 M H <sub>2</sub> SO <sub>4</sub>     | 297(at 1 A g <sup>-1</sup> )     | S14 |
| PANI hydrogel             | 1 M H <sub>2</sub> SO <sub>4</sub>     | 252(at 0.5 A g <sup>-1</sup> )   | S15 |
| This work                 | 1 M H <sub>2</sub> SO <sub>4</sub>     | 513(at 0.25 A g <sup>-1</sup> )  |     |

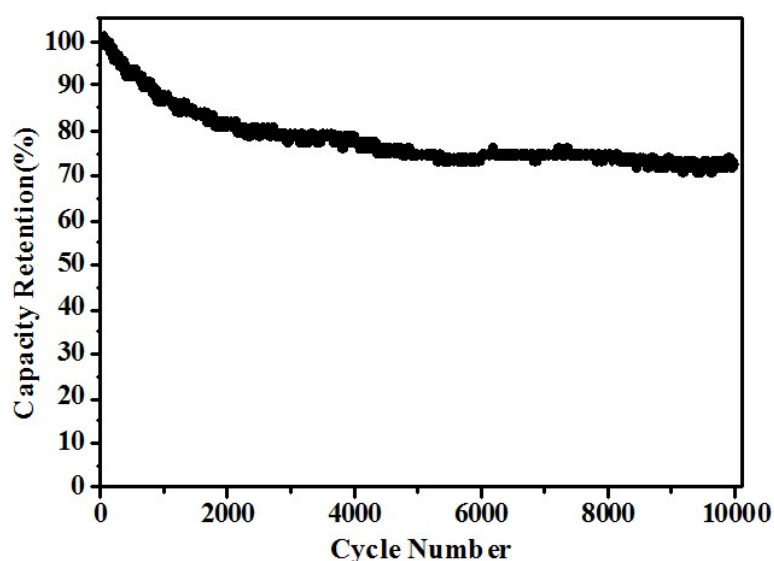

Fig. S5 The cycling stability of the Oxidized SPCN/PANI-0.02 at 5 A g<sup>-1</sup>.

S1. K. Zhou, Y. He, Q. Xu, Q. e. Zhang, A. a. Zhou, Z. Lu, L.-K. Yang, Y. Jiang, D. Ge, X. Y. Liu and H. Bai, *Acs Nano*, 2018, **12**, 5888-5894.

S2. M. Hwang, J. Oh, J. Kang, K.-d. Seong and Y. Piao, *Electrochimica Acta*, 2016, **221**, 23-30.

S3. Z. Gao, J. Yang, J. Huang, C. Xiong and Q. Yang, *Nanoscale*, 2017, **9**, 17710-17716.

S4. M. Hwang, J. Oh, J. Kang, K.-d. Seong and Y. Piao, *Electrochimica Acta*, 2016, **221**, 23-30.

S5. E. H. Jo, H. D. Jang, H. Chang, S. K. Kim, J.-H. Choi and C. M. Lee, *Chemsuschem*, 2017, **10**, 2210-2217.

S6. A. G. Tabrizi, N. Arsalani, A. Mohammadi, L. S. Ghadimi, I. Ahadzadeh and H.

- Namazi, *Electrochimica Acta*, 2018, **265**, 379-390.
- S7. J. Xu, K. Wang, S.-Z. Zu, B.-H. Han and Z. Wei, *Acs Nano*, 2010, **4**, 5019-5026.
- S8. Y. Meng, K. Wang, Y. Zhang and Z. Wei, *Advanced Materials*, 2013, **25**, 6985-6990.
- S9. L. Li, A.-R. O. Raji, H. Fei, Y. Yang, E. L. G. Samuel and J. M. Tour, *Acs Applied Materials & Interfaces*, 2013, **5**, 6622-6627.
- S10. P. Yu, Y. Li, X. Zhao, L. Wu and Q. Zhang, *Langmuir*, 2014, **30**, 5306-5313.
- S11. W. Fan, Y.-E. Miao, L. Zhang, Y. Huang and T. Liu, *RSC Adv.*, 2015, **5**, 31064-31073.
- S12. Z. Gao, J. Yang, J. Huang, C. Xiong and Q. Yang, *Nanoscale*, 2017, **9**, 17710-17716.
- S13. C. Meng, C. Liu and S. Fan, *Electrochemistry Communications*, 2009, **11**, 186-189.
- S14. X. Wang, J. Deng, X. Duan, D. Liu, J. Guo and P. Liu, *Journal of Materials Chemistry A*, 2014, **2**, 12323-12329.
- S15. H. Huang, X. Zeng, W. Li, H. Wang, Q. Wang and Y. Yang, *Journal of Materials Chemistry A*, 2014, **2**, 16516-16522.
